# Supplementary material for: A fixed agreement—consequences of brood size manipulation on alternation in blue tits
Source: PeerJ. 2019 Apr 24;7:e6826. doi: 10.7717/peerj.6826 (PMC6486810; doi:10.7717/peerj.6826)
Supplement: Supplemental Information 1 [file peerj-07-6826-s001.xlsx]

## Sheet: Dataset used for models
nestnummer	chickstage	treatment	sex	visit rate	sum	alternation	pittagIDs	freq	small	medium	large	massgain
103	1	Control	bird 1/female	5.83667	16	0.4	0300037B7D	5	0.2	0.8	0	0.0605042
103	1	Control	bird 2/male	12.8407	16	0.4	030001B08D	11	0.727273	0.272727	0	0.0605042
103	2	Reduced	bird 1/female	8.11483	21	0.4	0300037B7D	10	0.5	0.5	0	0.0752412
103	2	Reduced	bird 2/male	8.92632	21	0.4	030001B08D	11	0.545455	0.454545	0	0.0752412
103	3	Enlarged	bird 1/female	7.77125	13	0.666667	0300037B7D	7	0.571429	0.428571	0	0.0632727
103	3	Enlarged	bird 2/male	6.66107	13	0.666667	030001B08D	6	0.333333	0.666667	0	0.0632727
105	1	Reduced	bird 1/female	15.2145	20	0.736842	030003B1CD	10	0.2	0.6	0.2	0.102385
105	1	Reduced	bird 2/male	15.2145	20	0.736842	030001EF4F	10	0.2	0.5	0.3	0.102385
105	2	Enlarged	bird 1/female	18.9341	21	0.65	030003B1CD	10	0.2	0.8	0	0.0824593
105	2	Enlarged	bird 2/male	20.8275	21	0.65	030001EF4F	11	0.181818	0.636364	0.181818	0.0824593
105	3	Control	bird 1/female	16.3098	21	0.6	030003B1CD	11	0.181818	0.818182	0	0.0575916
105	3	Control	bird 2/male	14.8271	21	0.6	030001EF4F	10	0.6	0.3	0.1	0.0575916
13	1	Control	bird 1/female	12.8356	25	0.75	0300026A05	10	0.3	0.5	0.2	0.0919708
13	1	Control	bird 2/male	19.2534	25	0.75	0300033EED	15	0.333333	0.6	0.0666667	0.0919708
13	3	Enlarged	bird 1/female	25.6137	24	0.695652	0300026A05	14	0.357143	0.428571	0.214286	0.0439024
13	3	Enlarged	bird 2/male	18.2955	24	0.695652	0300033EED	10	0.3	0.6	0.1	0.0439024
31	1	Reduced	bird 1/female	5.981	20	0.736842	0300024FD2	10	0.2	0.4	0.4	0.107213
31	1	Reduced	bird 2/male	5.981	20	0.736842	0300021D55	10	0.3	0.7	0	0.107213
31	2	Enlarged	bird 1/female	6.37387	23	0.636364	0300024FD2	10	0.1	0.8	0.1	0.113402
31	2	Enlarged	bird 2/male	8.28603	23	0.636364	0300021D55	13	0.0769231	0.769231	0.153846	0.113402
31	3	Control	bird 1/female	4.32402	10	0.666667	0300024FD2	5	0	0.4	0.6	0.0624339
31	3	Control	bird 2/male	4.32402	10	0.666667	0300021D55	5	0	1	0	0.0624339
37	1	Control	bird 1/female	9.30714	24	0.521739	0300020A60	10	0.4	0.5	0.1	0.0594783
37	1	Control	bird 2/male	13.03	24	0.521739	300037910	14	0.214286	0.642857	0.142857	0.0594783
37	2	Enlarged	bird 1/female	13.5414	29	0.571429	0300020A60	10	0.1	0.9	0	0.0821293
37	2	Enlarged	bird 2/male	25.7286	29	0.571429	300037910	19	0.210526	0.578947	0.210526	0.0821293
37	3	Reduced	bird 1/female	5.45761	17	0.5625	0300020A60	5	0.4	0.6	0	-0.0430034
37	3	Reduced	bird 2/male	13.0983	17	0.5625	300037910	12	0.25	0.75	0	-0.0430034
41	1	Reduced	bird 1/female	6.82449	26	0.6	030001D52F	10	0	0.7	0.3	0.15823
41	1	Reduced	bird 2/male	10.9192	26	0.6	030001B72D	16	0.3125	0.625	0.0625	0.15823
41	2	Enlarged	bird 1/female	9.48309	26	0.48	030001D52F	10	0.4	0.6	0	0.0820312
41	2	Enlarged	bird 2/male	15.1729	26	0.48	030001B72D	16	0.25	0.75	0	0.0820312
41	3	Control	bird 1/female	9.18128	32	0.516129	030001D52F	9	0.444444	0.555556	0	0.130662
41	3	Control	bird 2/male	23.4633	32	0.516129	030001B72D	23	0.652174	0.347826	0	0.130662
42	1	Enlarged	bird 1/female	20.0633	21	0.8	030001EBBD	10	0.3	0.6	0.1	0.0852459
42	1	Enlarged	bird 2/male	22.0696	21	0.8	03000325C4	11	0.272727	0.363636	0.363636	0.0852459
42	2	Control	bird 1/female	12.0746	26	0.52	030001EBBD	16	0.3125	0.625	0.0625	0.0690789
42	2	Control	bird 2/male	7.54662	26	0.52	03000325C4	10	0.7	0.3	0	0.0690789
43	1	Reduced	bird 1/female	18.584	20	0.736842	030001CA29	11	0.181818	0.818182	0	0.0917399
43	1	Reduced	bird 2/male	15.2051	20	0.736842	300037664	9	0.444444	0.555556	0	0.0917399
43	2	Enlarged	bird 1/female	6.27663	22	0.380952	030001CA29	10	0.3	0.7	0	0.0776978
43	2	Enlarged	bird 2/male	7.53196	22	0.380952	300037664	12	0.25	0.666667	0.0833333	0.0776978
43	3	Control	bird 1/female	19.895	32	0.451613	030001CA29	23	0.173913	0.73913	0.0869565	0.0918033
43	3	Control	bird 2/male	7.78498	32	0.451613	300037664	9	0.666667	0.333333	0	0.0918033
45	1	Enlarged	bird 1/female	16.1126	24	0.652174	030002B20A	14	0.357143	0.642857	0	0.0909091
45	1	Enlarged	bird 2/male	11.509	24	0.652174	300034964	10	0.6	0.3	0.1	0.0909091
51	1	Enlarged	bird 1/female	19.9255	21	0.75	03000237ED	11	0.181818	0.727273	0.0909091	0.1409
51	1	Enlarged	bird 2/male	18.1141	21	0.75	030001BC12	10	0.2	0.7	0.1	0.1409
51	2	Control	bird 1/female	9.86401	21	0.45	03000237ED	10	0.2	0.7	0.1	0.0791444
51	2	Control	bird 2/male	10.8504	21	0.45	030001BC12	11	0.545455	0.454545	0	0.0791444
51	3	Reduced	bird 1/female	7.59095	20	0.473684	03000237ED	10	0.4	0.6	0	0.0958763
51	3	Reduced	bird 2/male	7.59095	20	0.473684	030001BC12	10	0.4	0.4	0.2	0.0958763
56	1	Control	bird 1/female	9.64173	24	0.652174	030001CEAC	10	0.1	0.7	0.2	0.082623
56	1	Control	bird 2/male	13.4984	24	0.652174	03000385FD	14	0.642857	0.357143	0	0.082623
56	2	Reduced	bird 1/female	8.29132	22	0.714286	030001CEAC	10	0.4	0.6	0	0.0821918
56	2	Reduced	bird 2/male	9.94958	22	0.714286	03000385FD	12	0.833333	0.166667	0	0.0821918
56	3	Enlarged	bird 1/female	13.0479	22	0.761905	030001CEAC	10	0.1	0.9	0	0.101866
56	3	Enlarged	bird 2/male	15.6575	22	0.761905	03000385FD	12	0.5	0.416667	0.0833333	0.101866
65	1	Control	bird 1/female	16.4904	20	0.684211	030003C59E	11	0.272727	0.636364	0.0909091	0.0493601
65	1	Control	bird 2/male	13.4922	20	0.684211	030003CAAF	9	0.111111	0.888889	0	0.0493601
65	2	Reduced	bird 1/female	11.6077	20	0.631579	030003C59E	10	0.3	0.6	0.1	0.104124
65	2	Reduced	bird 2/male	11.6077	20	0.631579	030003CAAF	10	0.3	0.6	0.1	0.104124
65	3	Enlarged	bird 1/female	55.9218	28	0.592593	030003C59E	18	0.388889	0.555556	0.0555556	0.105302
65	3	Enlarged	bird 2/male	31.0677	28	0.592593	030003CAAF	10	0.3	0.7	0	0.105302
66	1	Control	bird 1/female	41.5829	22	0.809524	03000270F9	10	0.4	0.6	0	0.0557621
66	1	Control	bird 2/male	49.8995	22	0.809524	0300035C2D	12	0.5	0.5	0	0.0557621
66	2	Reduced	bird 1/female	12.1447	21	0.8	03000270F9	11	0.454545	0.545455	0	0.136134
66	2	Reduced	bird 2/male	11.0406	21	0.8	0300035C2D	10	0.3	0.5	0.2	0.136134
66	3	Enlarged	bird 1/female	22.2783	20	0.684211	03000270F9	10	0.4	0.6	0	0.10123
66	3	Enlarged	bird 2/male	22.2783	20	0.684211	0300035C2D	10	0.7	0.3	0	0.10123
67	1	Control	bird 1/female	13.5951	23	0.5	030002FF48	10	0.7	0.2	0.1	0.0680073
67	1	Control	bird 2/male	17.6736	23	0.5	030001C765	13	0.384615	0.538462	0.0769231	0.0680073
67	2	Reduced	bird 1/female	5.4625	31	0.566667	030002FF48	10	0.7	0.3	0	0.139383
67	2	Reduced	bird 2/male	11.4712	31	0.566667	030001C765	21	0.285714	0.571429	0.142857	0.139383
67	3	Enlarged	bird 1/female	15.6872	23	0.545455	030002FF48	10	0.3	0.7	0	0.103226
67	3	Enlarged	bird 2/male	20.3934	23	0.545455	030001C765	13	0.615385	0.384615	0	0.103226
85	2	Reduced	bird 1/female	6.61481	26	0.64	030002076D	9	0.222222	0.555556	0.222222	0.102041
85	2	Reduced	bird 2/male	12.4946	26	0.64	030001B5AA	17	0.294118	0.647059	0.0588235	0.102041
85	3	Enlarged	bird 1/female	13.4429	10	0.666667	030002076D	4	0.25	0.75	0	0.0743169
85	3	Enlarged	bird 2/male	20.1643	10	0.666667	030001B5AA	6	0.333333	0.666667	0	0.0743169
94	1	Enlarged	bird 1/female	14.2567	29	0.642857	3.00E+96	10	0.4	0.6	0	0.099006
94	1	Enlarged	bird 2/male	27.0877	29	0.642857	0300039E4C	19	0.473684	0.526316	0	0.099006
94	2	Control	bird 1/female	9.4697	34	0.424242	3.00E+96	10	0.4	0.6	0	0.0944162
94	2	Control	bird 2/male	22.7273	34	0.424242	0300039E4C	24	0.375	0.541667	0.0833333	0.0944162
94	3	Reduced	bird 1/female	6.226	60	0.288136	3.00E+96	10	0.3	0.6	0.1	0.0816327
94	3	Reduced	bird 2/male	31.13	60	0.288136	0300039E4C	50	0.5	0.48	0.02	0.0816327
98	1	Control	bird 1/female	12.4649	32	0.548387	030003B497	9	0.444444	0.555556	0	0.0915254
98	1	Control	bird 2/male	31.8547	32	0.548387	030003C5F5	23	0.695652	0.304348	0	0.0915254
98	2	Enlarged	bird 1/female	11.6872	43	0.428571	030003B497	10	0.5	0.5	0	0.0772174
98	2	Enlarged	bird 2/male	38.5677	43	0.428571	030003C5F5	33	0.454545	0.545455	0	0.0772174
98	3	Reduced	bird 1/female	6.96756	27	0.615385	030003B497	10	0.4	0.6	0	0.075162
98	3	Reduced	bird 2/male	11.8449	27	0.615385	030003C5F5	17	0.294118	0.588235	0.117647	0.075162
k119	1	Enlarged	bird 1/female	8.4674	43	0.357143	300023363	10	0.2	0.7	0.1	0.0795812
k119	1	Enlarged	bird 2/male	27.9424	43	0.357143	030001DB01	33	0.181818	0.757576	0.0606061	0.0795812
k119	2	Reduced	bird 1/female	3.84844	28	0.555556	300023363	9	0.111111	0.777778	0.111111	0.0742475
k119	2	Reduced	bird 2/male	8.12448	28	0.555556	030001DB01	19	0.315789	0.578947	0.105263	0.0742475
k119	3	Control	bird 1/female	12.8178	32	0.580645	300023363	10	0.5	0.5	0	0.0960784
k119	3	Control	bird 2/male	28.1991	32	0.580645	030001DB01	22	0.318182	0.681818	0	0.0960784
k50	1	Control	bird 1/female	8.83414	26	0.44	030001AA33	10	0.3	0.6	0.1	0.1025
k50	1	Control	bird 2/male	14.1346	26	0.44	0300031B87	16	0.5	0.5	0	0.1025
k50	3	Enlarged	bird 1/female	19.1093	20	0.526316	030001AA33	10	0.4	0.6	0	0.0796574
k50	3	Enlarged	bird 2/male	19.1093	20	0.526316	0300031B87	10	0.5	0.4	0.1	0.0796574
k52	1	Reduced	bird 1/female	9.64656	24	0.565217	03000201BE	10	0.5	0.5	0	0.0751342
k52	1	Reduced	bird 2/male	13.5052	24	0.565217	03000214C3	14	0.857143	0.142857	0	0.0751342
k52	2	Enlarged	bird 1/female	11.3251	26	0.64	03000201BE	10	0.2	0.5	0.3	0.0863158
k52	2	Enlarged	bird 2/male	18.1201	26	0.64	03000214C3	16	0.4375	0.5625	0	0.0863158
k52	3	Control	bird 1/female	9.34143	21	0.85	03000201BE	10	0.5	0.3	0.2	0.0790774
k52	3	Control	bird 2/male	10.2756	21	0.85	03000214C3	11	0.818182	0.181818	0	0.0790774
k72	1	Reduced	bird 1/female	8.80928	27	0.692308	030003AF02	10	0.5	0.5	0	0.0464646
k72	1	Reduced	bird 2/male	14.9758	27	0.692308	030002F560	17	0.294118	0.705882	0	0.0464646

## Sheet: Explanation variables
nestnummer	Nest identification number
chickstage	post hatching day 8 =1, day 9 = 2, day 10 = 3
treatment	brood size manipulation; control, enlarged or reduced
sex	1 = female, 2 = male
visit rate	Visit rate calculated as visits per hour
sum	the total number of visits of a pair, used for the binomial model as weight
alternation	The alternation level of the visit sequence of a pair
pittagIDs	Unique identification number of individual parents
freq	number of prey sizes brought per individual, used in the binomial model as weight
Small	proportion of small prey items
Medium	proportion of medium prey items
Large	proportion of large prey items
massgain	Mean weight gain (only resident nestlings) calculated by average weight gain divided by the total hours of the treatment (brood size manipulation) exposure.
